# Supplementary material for: Polynucleotides Suppress Inflammation and Stimulate Matrix Synthesis in an In Vitro Cell-Based Osteoarthritis Model
Source: MDPI journal article supplement (doi:10.3390/ijms241512282), 2023-07-31
Supplement: s1 [file s1]

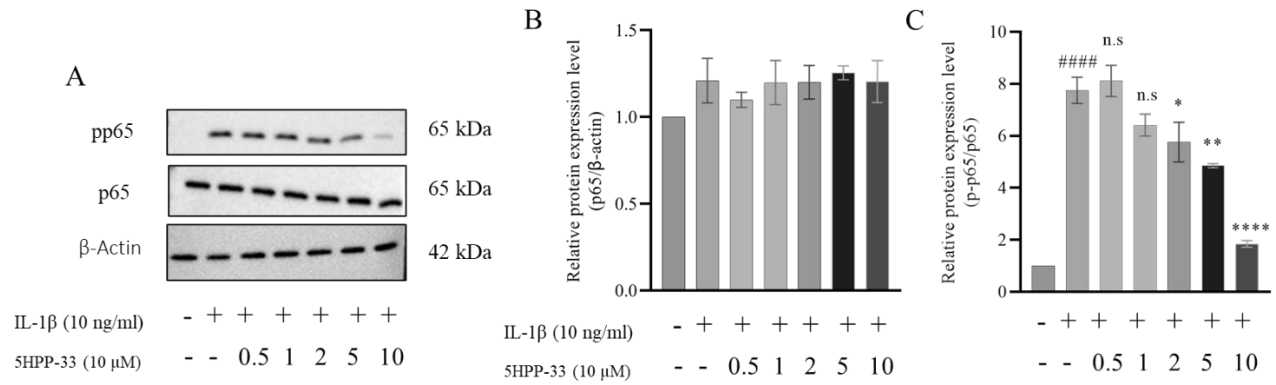

Supplementary Figure S1: Concentration dependent effect of 5HPP-33 inhibitor on pp65 and p65 protein expression levels. (A) Western blot analysis depicting the expression of pp65 and p65 proteins in response to different concentrations of the inhibitor, 5HPP-33. (B, C) Quantitative analysis of the protein expression levels, presented as mean  $\pm$  standard deviation ( $n = 3$ ). Statistical significance is denoted as n.s (no significance), ##### $p < 0.0001$  compared to the control group, \* $p < 0.05$ , \*\* $p < 0.01$ , \*\*\* $p < 0.001$ , and \*\*\*\* $p < 0.0001$  compared to the IL-1 $\beta$ -treated group.
